# Supplementary material for: The neural transfer effect of working memory training to enhance hedonic processing in individuals with social anhedonia
Source: PubMed Central journal article supplement (PMC5067564; doi:10.1038/srep35481), 2016-10-18
Supplement: srep35481-s1.pdf [file srep35481-s1.pdf]

# **The neural transfer effect of working memory training to enhance hedonic processing in individuals with social anhedonia**

Xu Li<sup>1,2,3</sup>, Zhi Li<sup>1,2</sup>, Ke Li<sup>4</sup>, Ya-wei Zeng<sup>4</sup>, Hai-song Shi<sup>1,2,5</sup>, Wen-lan Xie<sup>1,2</sup>, Zhuo-ya Yang<sup>1,2</sup>, Simon S. Y. Lui<sup>1,2,6</sup>, Eric F. C. Cheung<sup>6</sup>, Ada W. S. Leung<sup>7</sup>, Raymond C. K. Chan<sup>1,2\*</sup>

<sup>1</sup> Neuropsychology and Applied Cognitive Neuroscience Laboratory, CAS Key Laboratory of Mental Health, Institute of Psychology, Beijing, 100101, China

<sup>2</sup> University of Chinese Academy of Sciences, Beijing, 100048, China

<sup>3</sup> Key Laboratory of Adolescent Cyberpsychology and Behavior(CCNU), Ministry of Education, School of Psychology, Central China Normal University, Wuhan, 430079, China

<sup>4</sup> MRI Center, Hospital 306, 100101, Beijing, China

<sup>5</sup> North China Electric Power University, Beijing, 102206, China

<sup>6</sup> Castle Peak Hospital, Hong Kong Special Administration Region, China

<sup>7</sup> Department of Occupational Therapy & Institute of Neuroscience and Mental Health, University of Alberta, T6G 2G4, Canada

### Supplementary Materials

**Supplementary Table S1** Behavioral performances at the pre- and post-training sessions within the anhedonia group ( $n = 15$ )

|                       | Pre-training session |           | Post-training session |           | <i>t</i> | <i>p</i> |
|-----------------------|----------------------|-----------|-----------------------|-----------|----------|----------|
|                       | <i>Mean</i>          | <i>SD</i> | <i>Mean</i>           | <i>SD</i> |          |          |
| LNS total             | 19.53                | 3.72      | 22.67                 | 3.24      | 3.662    | 0.003    |
| CSAS                  | 22.67                | 3.27      | 18.8                  | 6.06      | 2.303    | 0.037    |
| TEPS                  | 70.53                | 13.06     | 70.8                  | 12.75     | 0.177    | 0.862    |
| Anticipatory pleasure | 30.07                | 7.96      | 29.6                  | 7.6       | 0.392    | 0.701    |
| Consummatory pleasure | 40.47                | 5.66      | 41.2                  | 5.82      | 1.244    | 0.234    |
| EES                   | 47.2                 | 12.8      | 50.47                 | 11.69     | 1.214    | 0.245    |
| Expression            | 14.4                 | 5.84      | 14.8                  | 4.93      | 0.313    | 0.759    |
| Suppression           | 32.8                 | 8.43      | 35.67                 | 7.53      | 1.705    | 0.11     |

LNS: Letter Number Span task; CSAS: Chapman Social Anhedonia Scale; TEPS: Temporal Experience of Pleasure Scale; EES: Emotional expressivity Scale. For the suppression subscale, lower score represents severe suppression from expressivity.

**Supplementary Table S2** Comparisons of brain activation differences in the anticipation and consummation phases of the AID and the MID tasks between the anhedonia ( $n = 14$ ) and controls ( $n = 19$ )

| conditions                             | contrast                               | numbers of sig. clusters | cluster size | x,y,z (MNI Coordinate) | peak $t$ | brain regions            |                  |
|----------------------------------------|----------------------------------------|--------------------------|--------------|------------------------|----------|--------------------------|------------------|
| <b>AID task: anticipation phase</b>    |                                        |                          |              |                        |          |                          |                  |
| reward cue>neutral cue                 | controls>SA                            | 0                        |              |                        |          |                          |                  |
|                                        | SA>controls                            | 2                        | 12           | 42 -63 24              | 4.40     | Middle Temporal Gyrus    |                  |
| punishment cue>neutral cue             |                                        |                          | 12           | 15 -60 24              | 3.79     | Precuneus                |                  |
|                                        | controls>SA                            | 0                        |              |                        |          |                          |                  |
|                                        | SA>controls                            | 0                        |              |                        |          |                          |                  |
|                                        |                                        |                          |              |                        |          |                          |                  |
| <b>AID task: consummation phase</b>    |                                        |                          |              |                        |          |                          |                  |
| reward cue hit > neutral cue hit       | controls>SA                            | 0                        |              |                        |          |                          |                  |
|                                        | SA>controls                            | 5                        | 86           | -57;12;-6              | 4.94     | Superior Temporal Gyrus  |                  |
|                                        |                                        |                          |              | -45;6;-6               | 4.87     | Insula                   |                  |
|                                        |                                        |                          | 46           | 57;-42;36              | 4.41     | Inferior Parietal Lobule |                  |
|                                        |                                        |                          |              | 60;-45;48              | 4.01     |                          |                  |
|                                        |                                        |                          | 12           | 54;-21;-9              | 4.11     | Superior Temporal Gyrus  |                  |
|                                        |                                        |                          | 11           | 33;51;6                | 4.02     | Middle Frontal Gyrus     |                  |
|                                        |                                        |                          | 12           | 54;-57;39              | 3.66     | Inferior Parietal Lobule |                  |
|                                        | punishment cue miss > neutral cue miss | controls>SA              | 0            |                        |          |                          |                  |
| SA>controls                            |                                        | 0                        |              |                        |          |                          |                  |
| <b>MID task: anticipation phase</b>    |                                        |                          |              |                        |          |                          |                  |
| reward cue>neutral cue                 | controls>SA                            | 3                        | 100          | -27;-45;-6             | 5.41     | Parahippocampus          |                  |
|                                        |                                        |                          |              | -33;-36;6              | 3.65     |                          |                  |
|                                        |                                        |                          | 82           | 24;-33;-12             | 4.60     | Parahippocampus          |                  |
|                                        |                                        |                          |              | 30;-39;-6              | 3.78     |                          |                  |
|                                        |                                        |                          |              | 21;-45;-15             | 3.59     |                          |                  |
|                                        |                                        |                          | 68           | -6;-30;-6              | 4.14     | Thalamus                 |                  |
|                                        |                                        |                          |              | 3;-30;-6               | 3.92     |                          |                  |
|                                        |                                        |                          |              | 9;-24;-6               | 3.90     |                          |                  |
|                                        |                                        | SA>controls              | 0            |                        |          |                          |                  |
|                                        | punishment cue>neutral cue             | controls>SA              | 1            | 13                     | 9;-24;-9 | 3.68                     | substantia nigra |
| SA>controls                            |                                        | 1                        | 14           | -54;-45;51             | 4.09     | Inferior Parietal Lobule |                  |
| <b>MID task: consummation phase</b>    |                                        |                          |              |                        |          |                          |                  |
| reward cue hit > neutral cue hit       | controls>SA                            | 0                        |              |                        |          |                          |                  |
|                                        | SA>controls                            | 0                        |              |                        |          |                          |                  |
| punishment cue miss > neutral cue miss | controls>SA                            | 0                        |              |                        |          |                          |                  |
|                                        | SA>controls                            | 0                        |              |                        |          |                          |                  |

|             |   |    |             |      |                        |
|-------------|---|----|-------------|------|------------------------|
| controls>SA | 0 |    |             |      |                        |
| SA>controls | 8 | 24 | 39;45;-6    | 4.56 | Inferior Frontal gyrus |
|             |   | 63 | 21;45;18    | 4.53 | Medial Frontal Gyrus   |
|             |   |    | 27;42;12    | 4.30 |                        |
|             |   |    | 21;54;12    | 3.93 |                        |
|             |   | 29 | 0;-78;-15   | 4.39 | Declive                |
|             |   |    | -6;-84;-21  | 3.75 |                        |
|             |   | 35 | 6;-3;18     | 4.29 | Thalamus               |
|             |   |    | 0;3;15      | 4.23 |                        |
|             |   | 15 | 57;21;21    | 4.20 | Middle Frontal Gyrus   |
|             |   | 44 | -48;-72;-6  | 4.05 | Fusiform Gyrus         |
|             |   |    | -39;-63;-15 | 3.69 |                        |
|             |   |    | -45;-63;-6  | 3.50 |                        |
|             |   | 36 | -57;-48;21  | 3.94 | Supramarginal Gyrus    |
|             |   |    | -57;-48;30  | 3.86 |                        |
|             |   | 21 | -24;-81;-24 | 3.79 | Uvula                  |
|             |   |    | -12;-84;-21 | 3.52 |                        |

---

SA: social anhedonia.

Control>SA: greater brain activations in the controls than individuals with social anhedonia.

SA>controls: greater brain activations in individuals with social anhedonia compared with controls.

**Supplementary Table S3** effects of working memory training on brain activations in the consummation phase of the AID and the MID task in individuals with social anhedonia ( $n = 14$ ).

|                                     | contrast                               | numbers of sig. clusters | cluster size | x,y,z (MNI Coordinate) | peak t | brain regions            |
|-------------------------------------|----------------------------------------|--------------------------|--------------|------------------------|--------|--------------------------|
| <b>AID task: consummation phase</b> |                                        |                          |              |                        |        |                          |
|                                     | reward cue hit > neutral cue hit       |                          |              |                        |        |                          |
|                                     | pre>post                               | 16                       | 98           | 24;-39;66              | 8.03   | Superior Parietal Lobule |
|                                     |                                        |                          |              | 18;-27;63              | 6.73   |                          |
|                                     |                                        |                          |              | 15;-15;69              | 5.05   |                          |
|                                     |                                        |                          | 763          | -27;-15;24             | 7.20   | Insula                   |
|                                     |                                        |                          |              | -15;-21;18             | 7.16   | Caudate Tail             |
|                                     |                                        |                          |              | 0;15;12                | 7.02   | Caudate Body             |
|                                     |                                        | 68                       |              | -6;-90;36              | 6.53   | Cuneus                   |
|                                     |                                        |                          |              | -12;-90;30             | 6.48   |                          |
|                                     |                                        |                          | 17           | 27;60;18               | 6.49   | Superior Frontal Gyrus   |
|                                     |                                        |                          | 33           | 30;-54;3               | 6.09   | Parahippocampus          |
|                                     |                                        |                          | 24           | -21;-27;60             | 5.73   | Postcentral Gyrus        |
|                                     |                                        |                          |              | -18;-30;72             | 4.29   |                          |
|                                     |                                        |                          | 21           | 12;-81;42              | 5.64   | Cuneus                   |
|                                     |                                        |                          |              | 21;-84;36              | 4.22   |                          |
|                                     |                                        |                          |              | 18;-90;30              | 4.19   |                          |
|                                     |                                        |                          | 192          | -12;-21;45             | 5.43   | Cingulate                |
|                                     |                                        |                          |              | -12;-6;45              | 5.32   |                          |
|                                     |                                        |                          |              | 3;-24;42               | 5.19   |                          |
|                                     |                                        |                          | 31           | -33;-69;-30            | 5.37   | Tuber                    |
|                                     |                                        |                          |              | -42;-60;-33            | 4.61   |                          |
|                                     |                                        |                          | 11           | 39;-54;-33             | 5.31   | Culmen                   |
|                                     |                                        |                          | 11           | -9;9;42                | 5.08   | Cingulate Cortex         |
|                                     |                                        |                          | 29           | 51;-21;9               | 5.03   |                          |
|                                     |                                        |                          | 11           | 27;33;39               | 4.97   | Middle Frontal Gyrus     |
|                                     |                                        |                          | 45           | -63;-36;12             | 4.93   | Superior Temporal Gyrus  |
|                                     |                                        |                          |              | -57;-39;18             | 4.54   |                          |
|                                     |                                        |                          |              | -69;-42;21             | 4.52   |                          |
|                                     |                                        |                          | 11           | 30;-15;45              | 4.87   | Precentral Gyrus         |
|                                     |                                        |                          |              | 24;-6;42               | 4.59   |                          |
|                                     |                                        |                          | 10           | 48;-12;42              | 4.76   | Precentral Gyrus         |
|                                     |                                        |                          |              | 42;-12;33              | 4.19   |                          |
|                                     | post>pre                               | 0                        |              |                        |        |                          |
|                                     | punishment cue miss > neutral cue miss |                          |              |                        |        |                          |
|                                     | pre>post                               | 0                        |              |                        |        |                          |
|                                     | post>pre                               | 0                        |              |                        |        |                          |
| <b>MID task: consummation phase</b> |                                        |                          |              |                        |        |                          |
|                                     | reward cue hit > neutral cue hit       |                          |              |                        |        |                          |

|                                        |          |   |    |             |      |                  |
|----------------------------------------|----------|---|----|-------------|------|------------------|
|                                        | pre>post | 1 | 21 | -54;-66;-12 | 6.37 | Fusiform Gyrus   |
|                                        |          |   |    | -48;-72;-12 | 5.67 |                  |
|                                        | post>pre | 0 |    |             |      |                  |
| punishment cue miss > neutral cue miss |          |   |    |             |      |                  |
|                                        | pre>post | 2 | 11 | -39;-45;-9  | 6.13 | Parahippocampus  |
|                                        |          |   | 14 | 36;9;30     | 4.49 | Precentral Gyrus |
|                                        |          |   |    | 39;18;33    | 3.93 |                  |
|                                        | post>pre | 0 |    |             |      |                  |

---

pre>post: decreased brain activations related with working memory training;

Post>pre: increased brain activations related with working memory training;

**Supplementary Table S4** Demographic information and other characteristics of the social anhedonia and controls

|                       | Social Anhedonia          | Controls                  | <i>t</i> / $\chi^2$ | <i>p</i> |
|-----------------------|---------------------------|---------------------------|---------------------|----------|
|                       | <i>Mean</i> ( <i>SD</i> ) | <i>Mean</i> ( <i>SD</i> ) |                     |          |
| Gender (total/male)   | 15/9                      | 19/11                     | 0.015               | 0.901    |
| Age                   | 20.13(1.25)               | 19.63(2.14)               | 0.855               | 0.399    |
| Education             | 13.8(0.94)                | 12.95(1.68)               | 1.869               | 0.072    |
| LNS total             | 19.53(3.72)               | 17.47(2.5)                | 1.927               | 0.063    |
| CSAS                  | 22.67(3.27)               | 6.23(2.20)                | 15.348              | 0.000    |
| TEPS                  | 70.53(13.06)              | 83.31(11.46)              | -2.730              | 0.011    |
| Anticipatory pleasure | 30.07(7.96)               | 36.23(5.8)                | -2.308              | 0.029    |
| Consummatory pleasure | 40.47(5.66)               | 43.31(7.09)               | -1.180              | 0.249    |
| EES                   | 47.2(12.8)                | 63.31(10.14)              | -3.649              | 0.001    |
| Expression            | 14.4(5.84)                | 16.92(3.86)               | -1.325              | 0.197    |
| Suppression           | 32.8(8.43)                | 46.38(7.95)               | -4.365              | 0.000    |

LNS: Letter Number Span task; CSAS: Chapman Social Anhedonia Scale; TEPS: Temporal Experience of Pleasure Scale; EES: Emotional expressivity Scale. For the suppression subscale, lower score represents severe suppression from expressivity.
